# Supplementary material
Source: Springer Nature journal article supplement (https://www.springermedizin.de/resource/supplementary/12879_2012_2547_MOESM6_ESM.pdf/9444842)

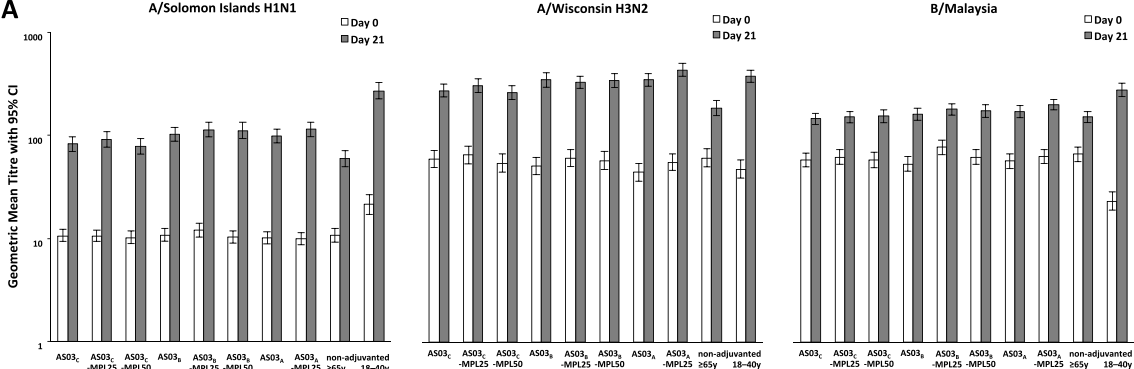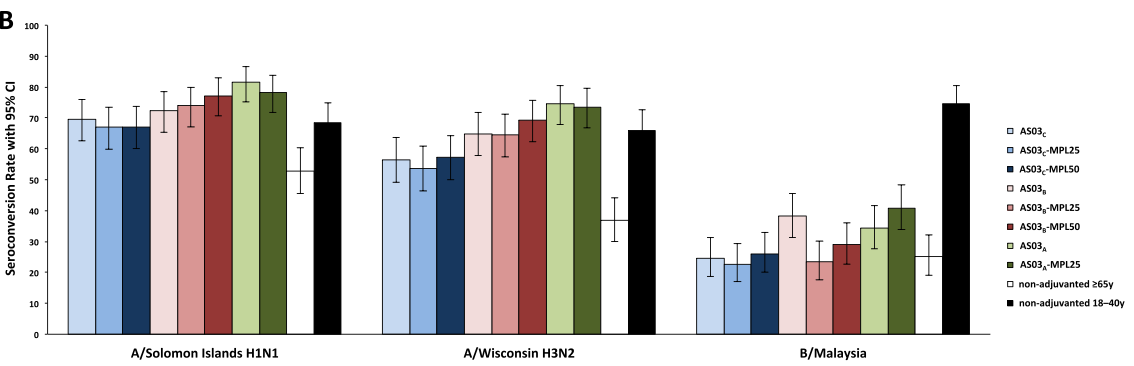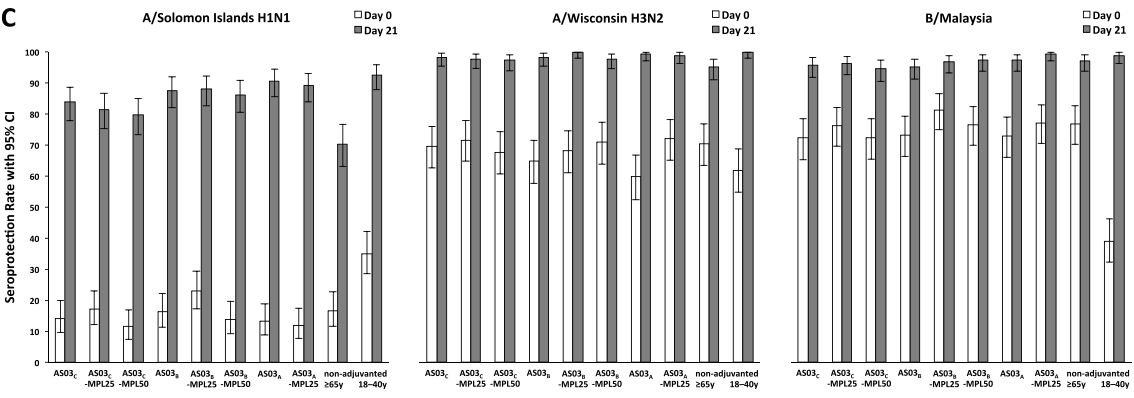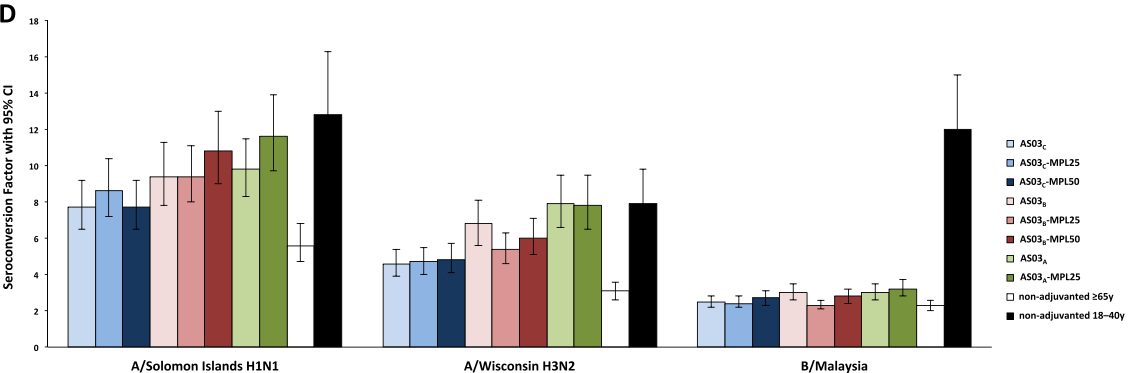

Supplement: MOESM6 [file 9444842]
